# Supplementary material for: Genetic diversity and structure of the critically endangered Artocarpus annulatus, a crop wild relative of jackfruit ( A. heterophyllus )
Source: PeerJ journal article supplement (doi:10.7717/peerj.9897), 2020-09-21

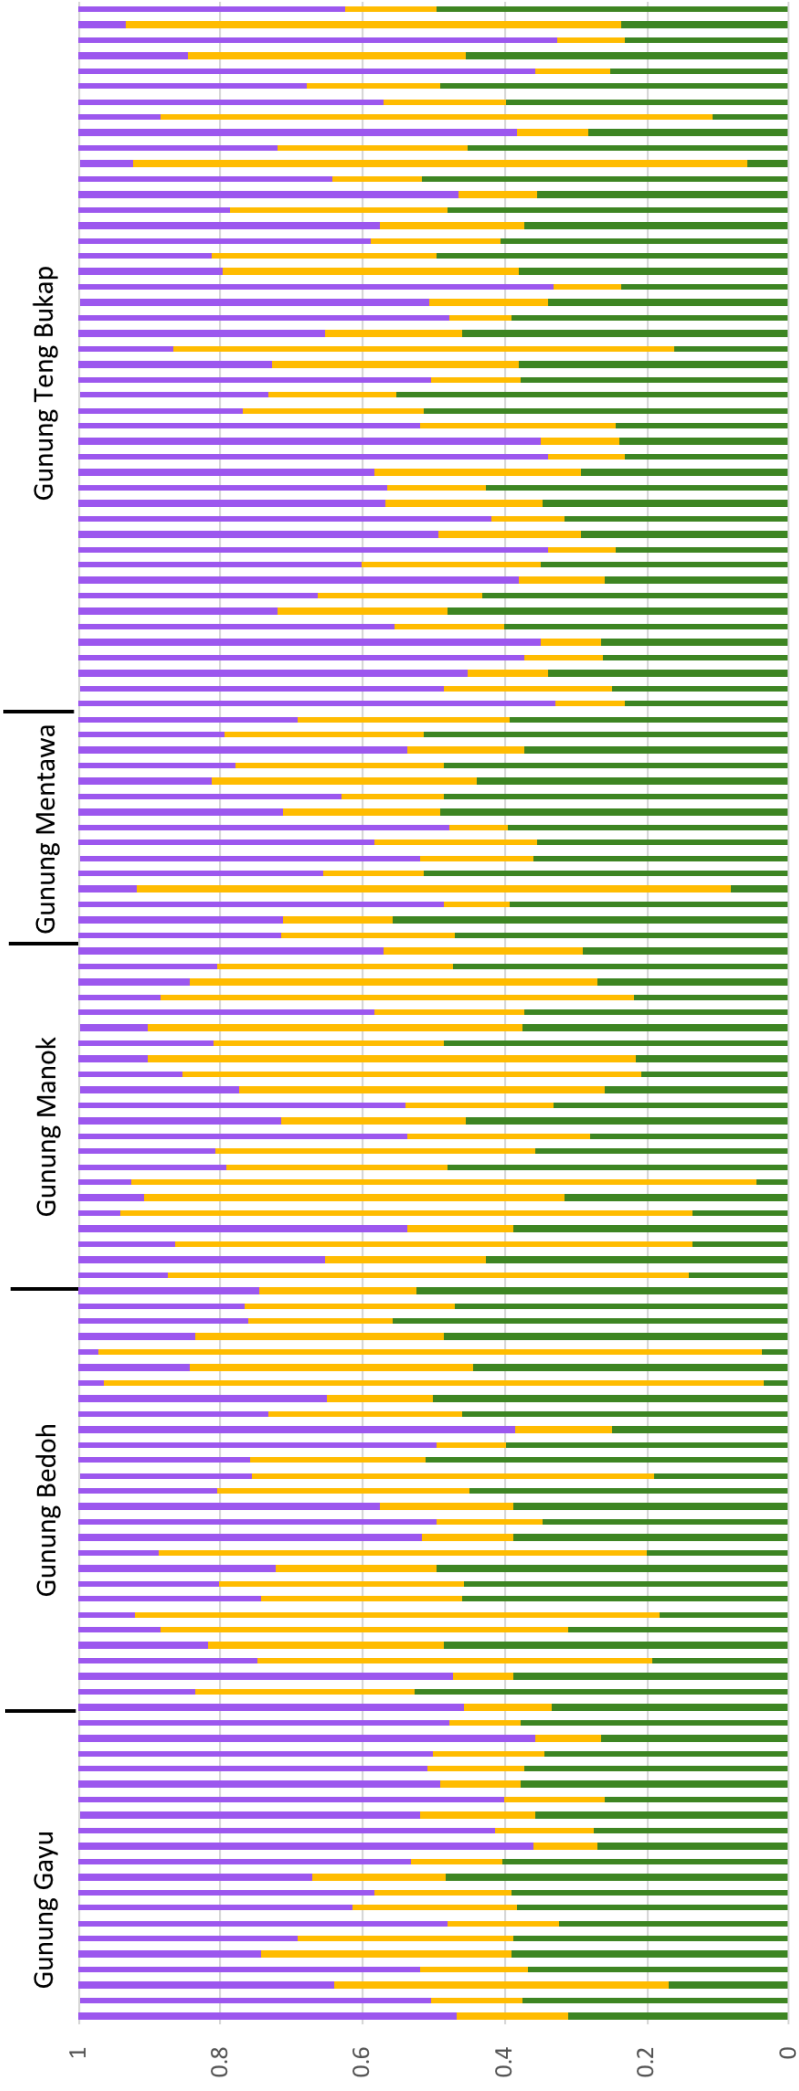

Supplement: Fig._S1.pdf [file Fig._S1.pdf]
